# Supplementary material for: Platycodin D from Platycodonis Radix enhances the anti-proliferative effects of doxorubicin on breast cancer MCF-7 and MDA-MB-231 cells
Source: PubMed Central journal article supplement (PMC4075934; doi:10.1186/1749-8546-9-16), 2014-06-09
Supplement: 1749-8546-9-16-S1.pdf [file 1749-8546-9-16-S1.pdf]

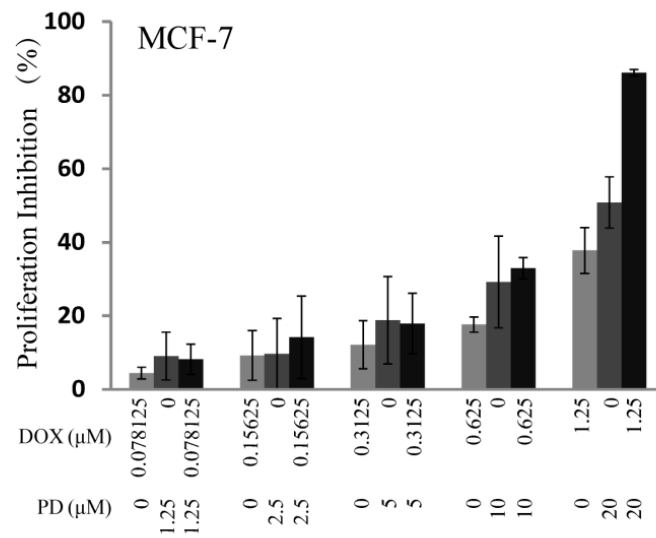

**Supplementary file 1. Effects of DOX, PD and DOX + PD on the viability of MCF-7 cells.** MCF-7 breast cancer cells were treated with various concentrations of DOX, PD or DOX + PD for 48 h. Then, the cell viability was determined by the MTT assay. Values were expressed as mean  $\pm$ SD of three independent assays.
